# Supplementary material for: Inhibitory Activity of Natural cis-Khellactone on Soluble Epoxide Hydrolase and Proinflammatory Cytokine Production in Lipopolysaccharides-Stimulated RAW264.7 Cells
Source: MDPI journal article supplement (doi:10.3390/plants12203656), 2023-10-23
Supplement: s1 [file s1]

# Supplementary Material

## Inhibitory activity of natural *cis*-khellactone on soluble epoxide hydrolase and proinflammatory cytokine production in LPS-stimulated RAW264.7 cells

Jang Hoon Kim<sup>1</sup>, Ji Hyeon Park<sup>2</sup>, Sung Cheol Koo<sup>1</sup>, Yun-Chan Hur<sup>1</sup>, Mok Hur<sup>1</sup>, Woo Tae Park<sup>1</sup>, Youn-Ho Moon<sup>1</sup>, Tae Il Kim<sup>1</sup>, Byoung Ok Cho<sup>2,\*</sup>

<sup>1</sup>Department of Herbal Crop Research, National Institute of Horticultural and Herbal Science, RDA, Eumseong, Chungcheongbuk-do, 27709, Republic Korea

<sup>2</sup>Institute of Health Science, Jeonju University, Jeonju-si, Jeollabuk-do, 55069, Republic of Korea

### \* Correspondence:

Corresponding Author : Byoung Ok Cho, Institute of Health Science, Jeonju University, 303 Cheonjam-ro, Wansan-gu, Jeonju-si, Jeollabuk-do, 55069, Republic of Korea

Tel: +82-63-220-2793, Fax: +82-63-220-2789, E-mail: enzyme21@jj.ac.kr

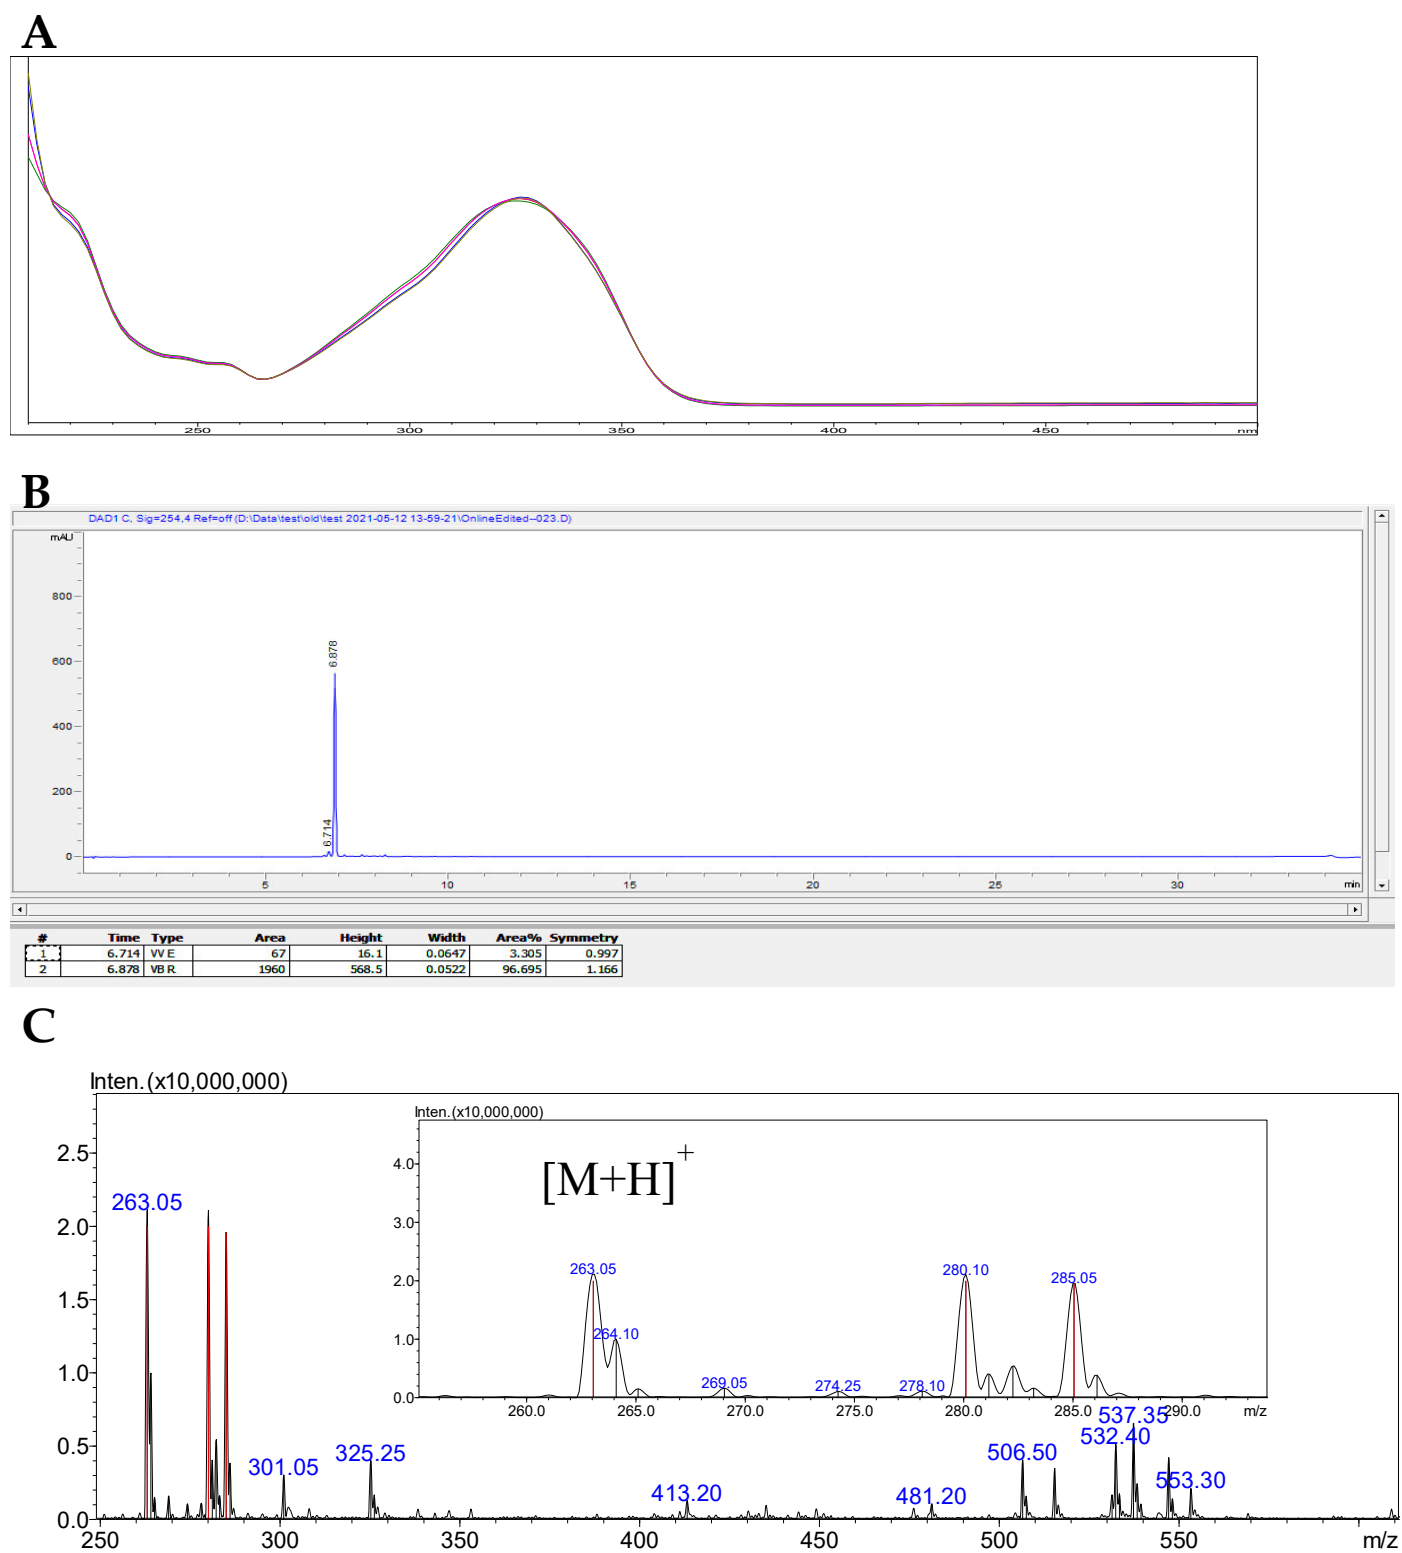

**Figure S1.** UV-Vis (A), HPLC (B) and Mass (C) spectra of *cis*-khellactone.

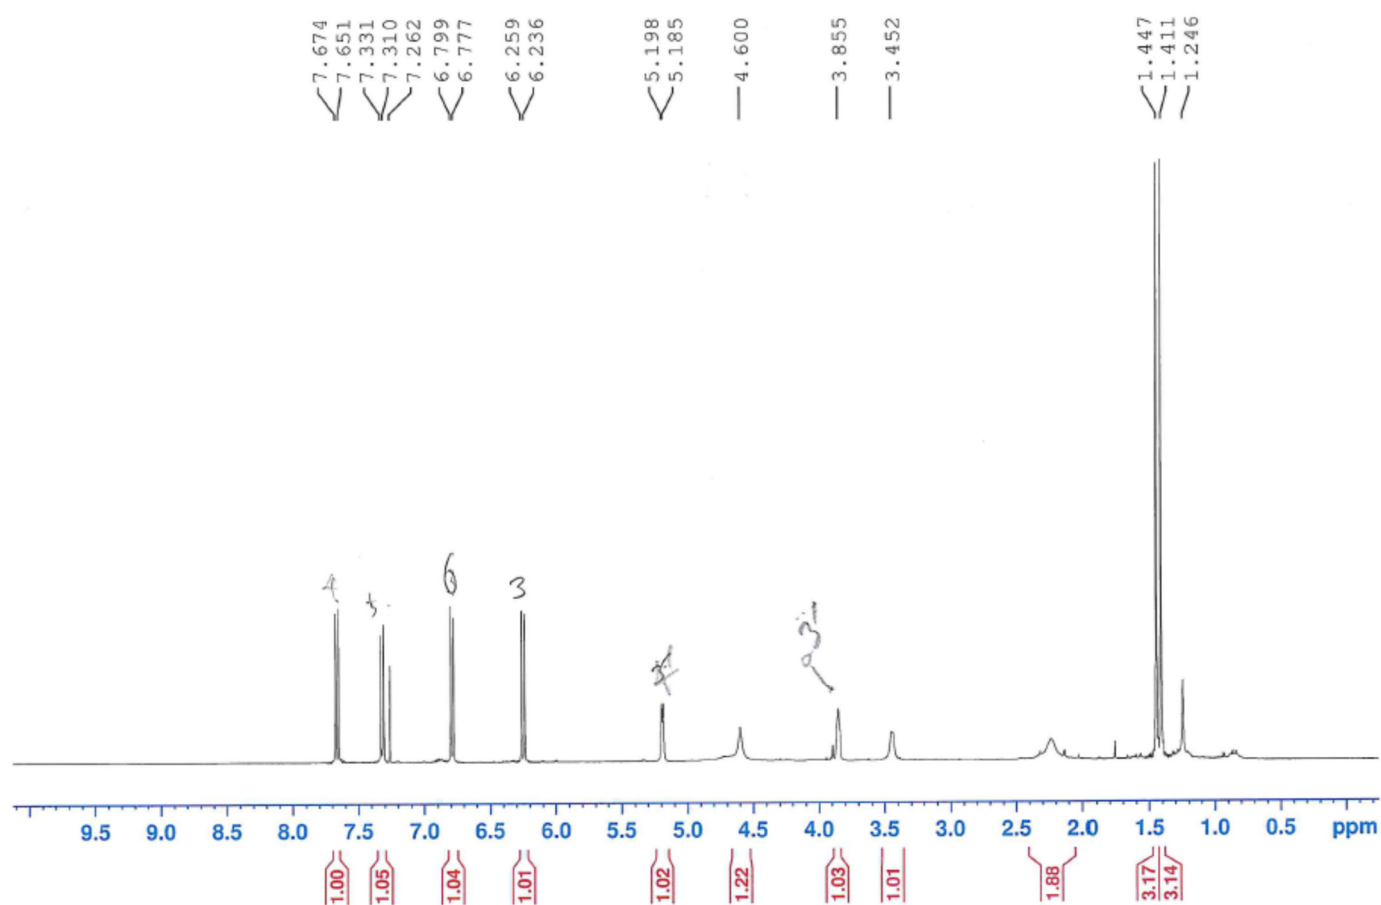

Figure S2. <sup>1</sup>H NMR spectrum of *cis*-khellactone (400 MHz, CDCl<sub>3</sub>-d).

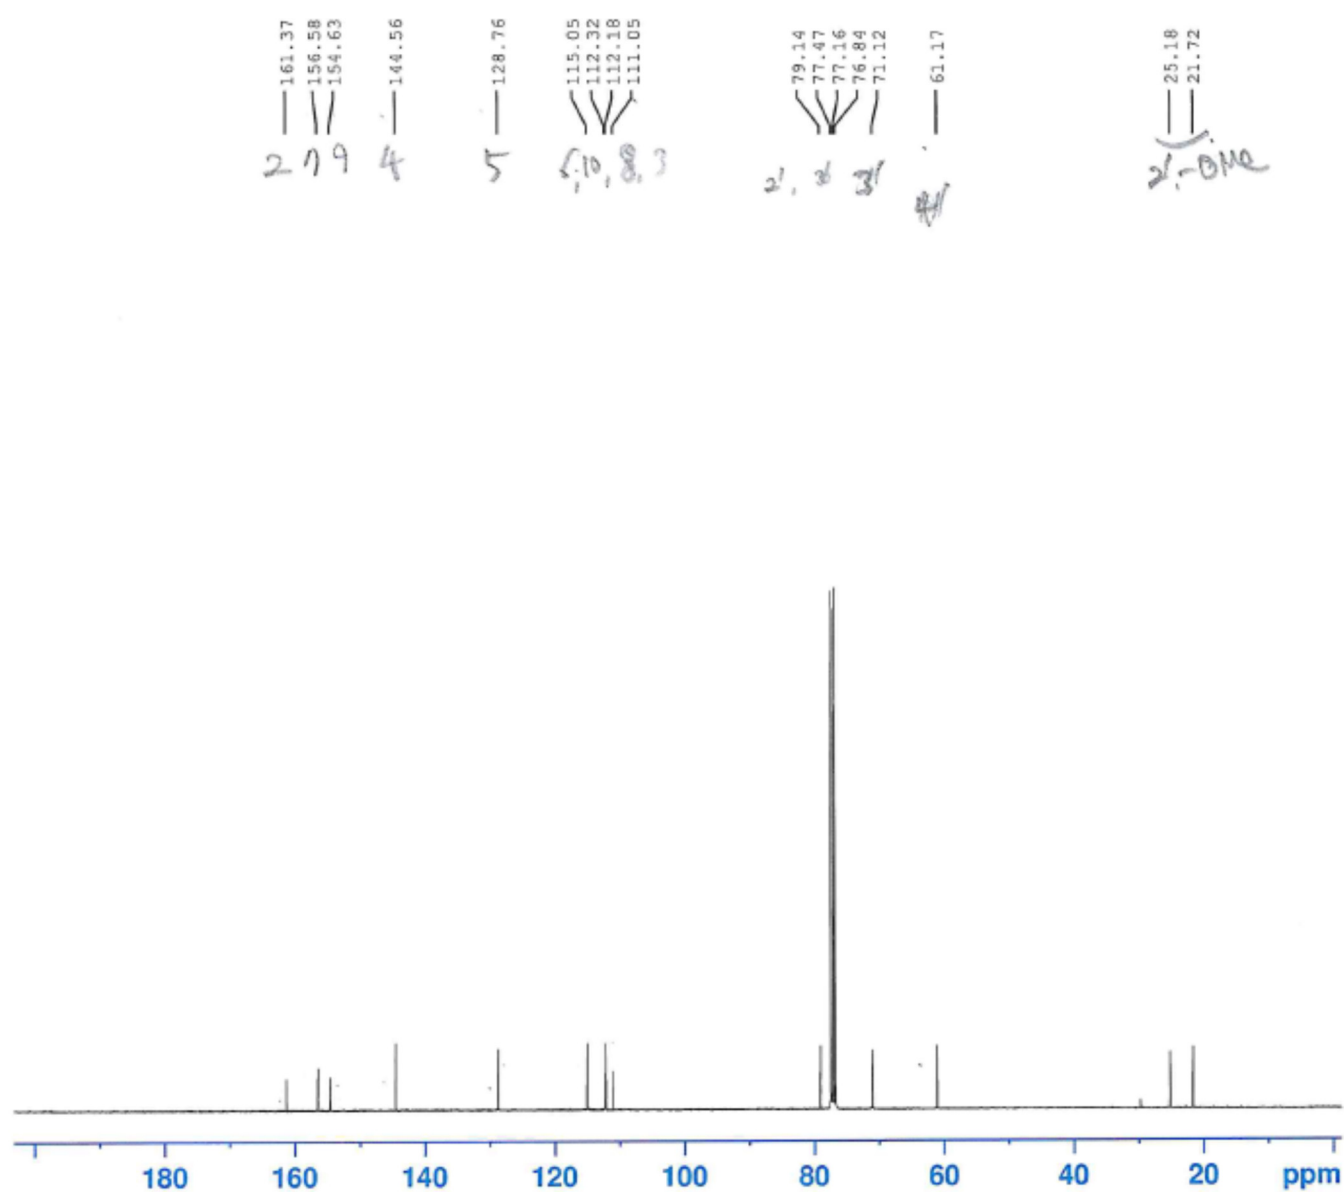

**Figure S3.** <sup>13</sup>C NMR spectrum of *cis*-khellactone (100 MHz, CDCl<sub>3</sub>-d).

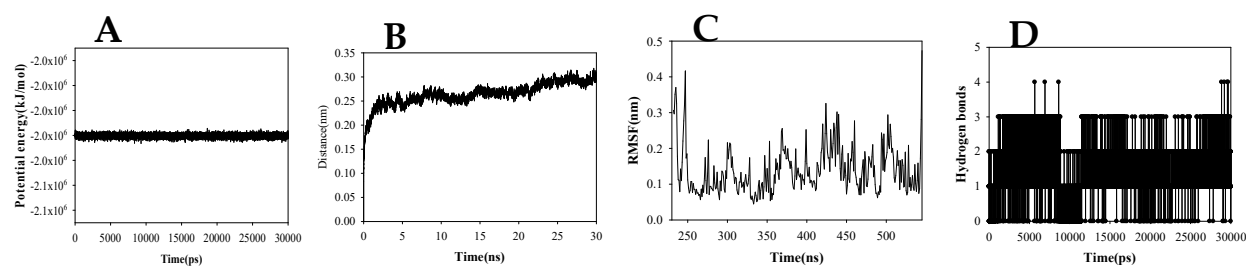

**Figure S4.** The potential energy (A) RMSD (B), RMSF (C), and hydrogen bond numbers (D) of the simulation calculated during 30 ns.
